# Supplementary material for: Green synthesized gold nanoparticles and CuO-based nonenzymatic sensor for saliva glucose monitoring
Source: Royal Society of Chemistry journal article supplement (doi:10.1039/d3ra05644a), 2024-01-01
Supplement: d3ra05644a1.pdf [file d3ra05644a1.pdf]

## Green synthesized gold nanoparticles and CuO-based nonenzymatic electrochemical sensor for saliva glucose monitoring

Md Younus Ali<sup>a</sup>, Heman B. Abdulrahman<sup>a</sup>, Wei-Ting Ting<sup>a</sup>, Matiar M. R. Howlader<sup>a\*</sup>

Department of Electrical and Computer Engineering, McMaster University

1280 Main Street West, Hamilton, ON, L8S 4K1, Canada

\*Correspondence: howladm@mcmaster.ca

### Supplementary Information

#### Green synthesis process for gold nanoparticle (AuNPs)

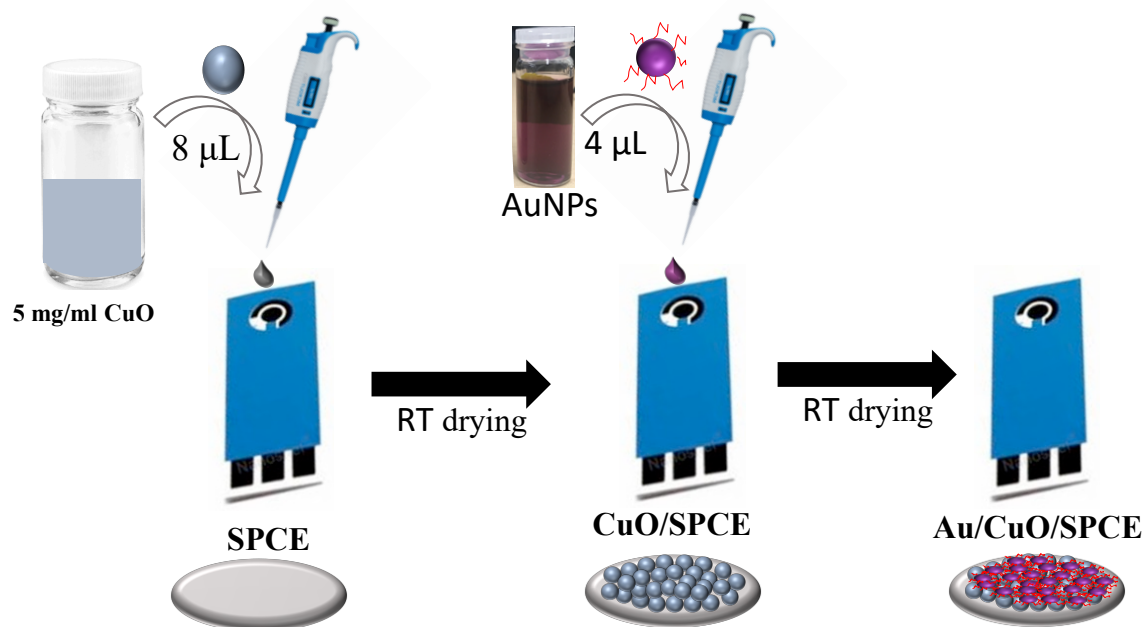

Fig.S1 . Schematic of preparation of Au/CuO/SPCE

#### AuNPs synthesis

#### Effect of precursor concentration and synthesis time

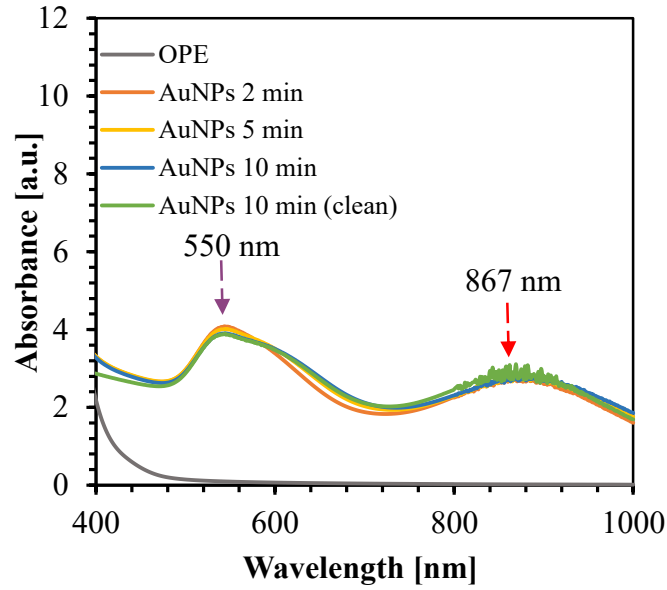

**Fig. S2.** UV-Vis absorption spectra of AuNPs using 125 ml of 1 mM HAuCl<sub>4</sub> where 40 ml of orange peel extract (OPE) were added drop-wise.

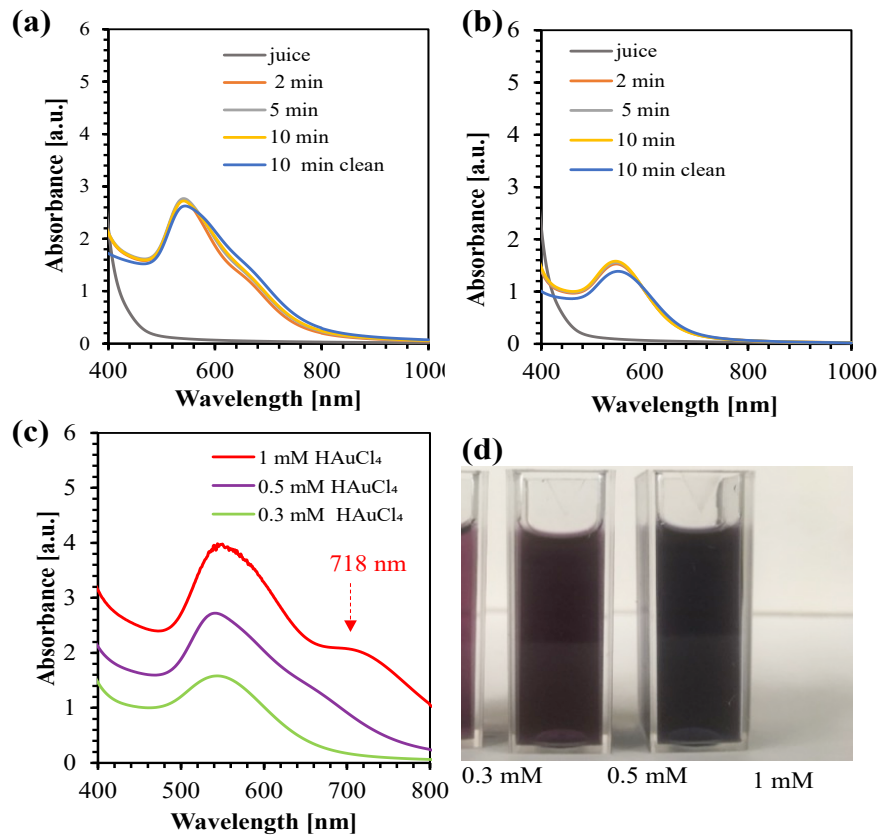

**Fig. S3.** UV-Vis absorption spectrum of AuNPs synthesis from (a) 0.5 M HAuCl<sub>4</sub>, (b) 0.3 M HAuCl<sub>4</sub> at 100° C, (c) adsorption spectra of AuNPs for different concentration of HAuCl<sub>4</sub> for two minutes synthesis, (d) color after 10 minutes synthesis (from pink to dark pink).

### Effect of pH on AuNPs synthesis

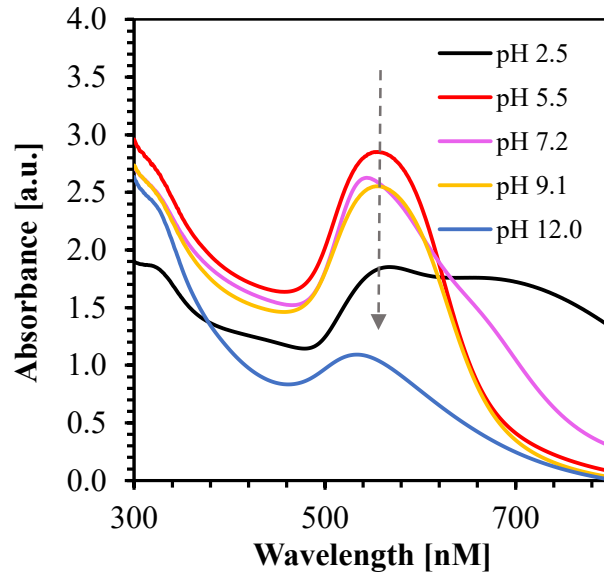

Fig.S4. UV-Vis absorption spectrum of AuNPs synthesis using 125 ml 0.5 mM HAuCl<sub>4</sub> and 40 ml OPE at 100° C for 10 min with different pH.

### Effect of temperature on AuNPs synthesis

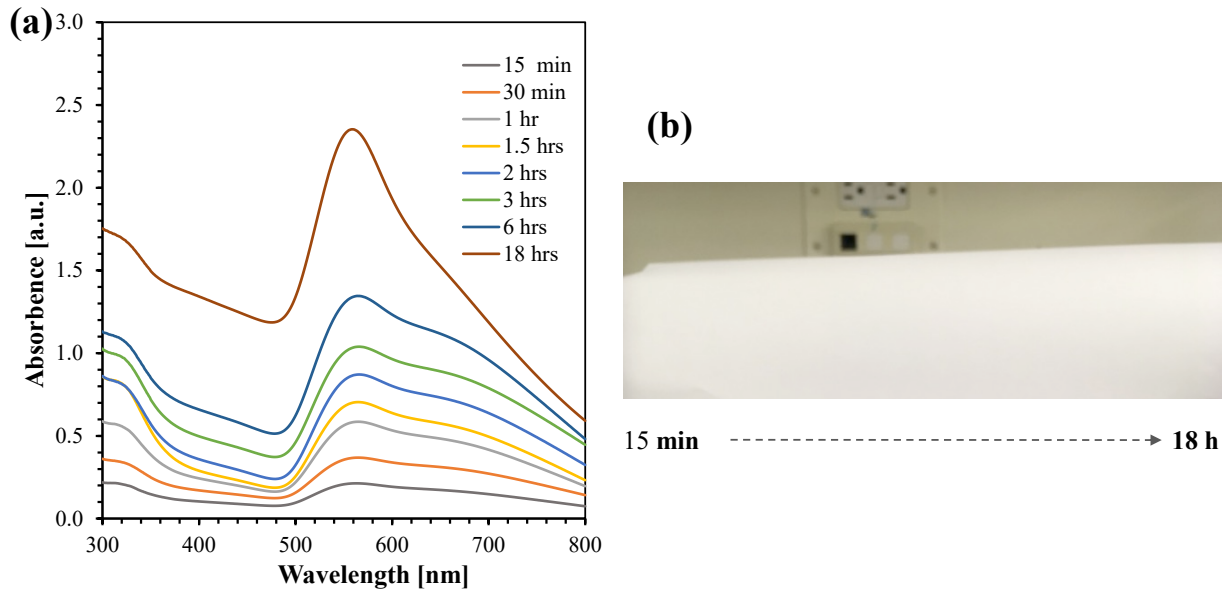

Fig. S5. Room temperature synthesis of AuNPs using 0.5 mM HAuCl<sub>4</sub>, (a) UV-Vis absorption spectrum and (b) AuNPs' colloidal color at different synthesis time.

## Electrochemical performance of Au/SPCE

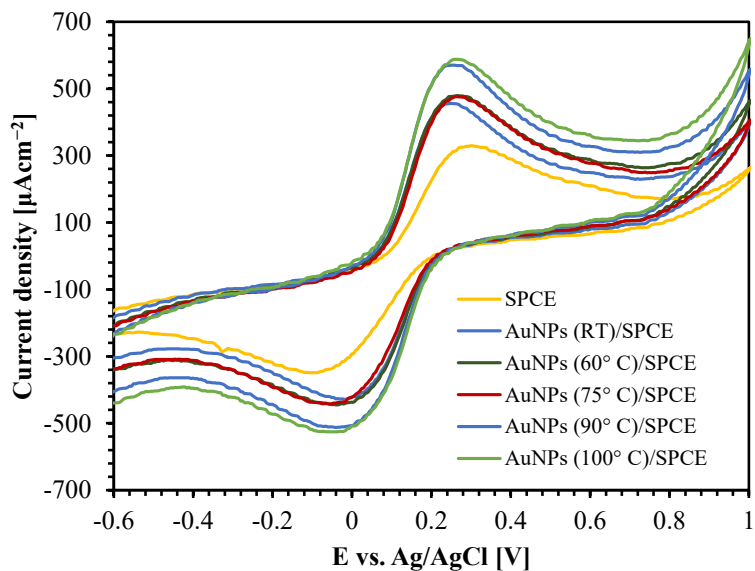

**Fig. S6.** CV responses of different AuNPs electrode in 5 mM  $\text{K}_4[\text{Fe}(\text{CN})_6]$  with 100 mM KCl at scan rate 60 mV/s. AuNPs were synthesised at different temperature (temperature (RT=  $20 \pm 2^\circ \text{C}$ ,  $60^\circ \text{C}$ ,  $75^\circ \text{C}$ ,  $90^\circ \text{C}$  and  $100^\circ \text{C}$ ) using 0.5 mM  $\text{HAuCl}_4$  and orange peel extract.

## Effect of concentration of NaOH

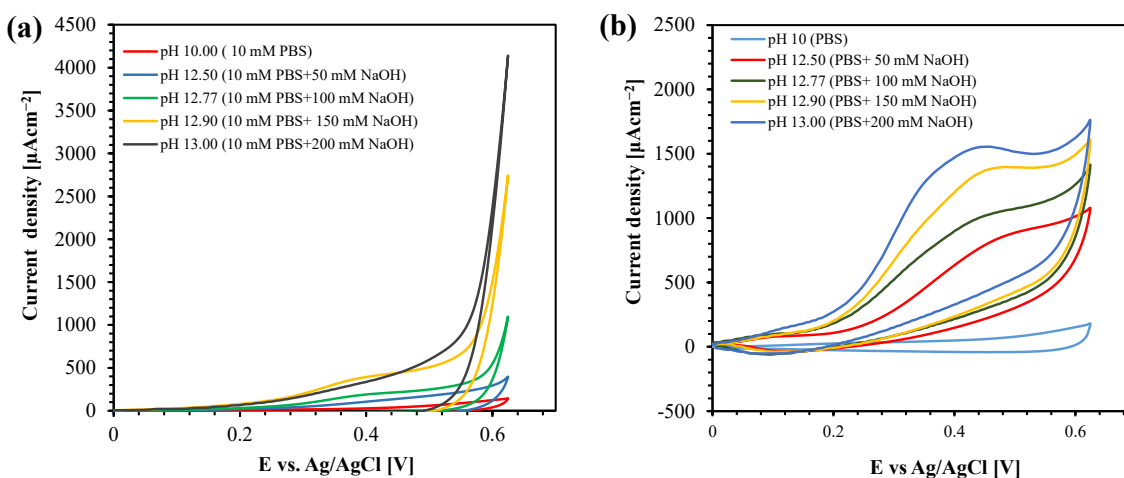

**Fig. S7.** Effect of pH and NaOH concentration (a) in the absence of glucose and (b) in the presence of 1 mM glucose at a scan rate of 60 mV/s

## Effect of scan rate

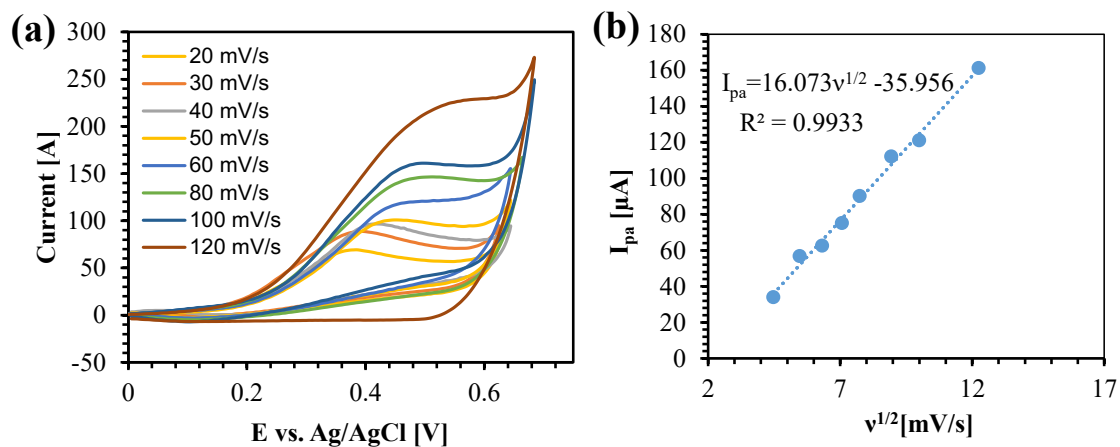

**Fig. S8.** (a) CV response of Au/CuO/SPCE in the presence of 1 mM glucose and 100 mM NaOH at different scan rate, (b) relationship between square root of scan ( $v$ ) and peak oxidation current  $I_{pa}$ .

## Reproducibility and stability of the sensor

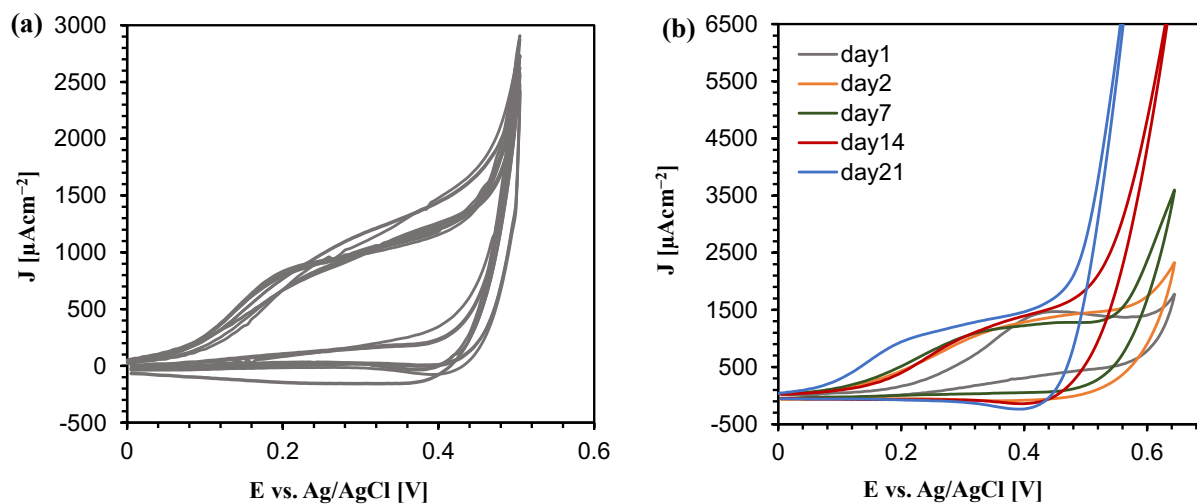

**Fig. S9.** (a) CV response of 10 Au/CuO/SPCEs on the same day after the synthesis (b) CV response of Au/CuO/SPCEs electrodes at different days in the presence of 1 mM glucose in 0.1NaOH at scan rate 60 mV/s.
